# Supplementary material
Source: PubMed Central journal article supplement (PMC7645264)
Supplement: EMBR-21-e48676-s001.pdf [file EMBR-21-e48676-s001.pdf]

## Expanded View Figures

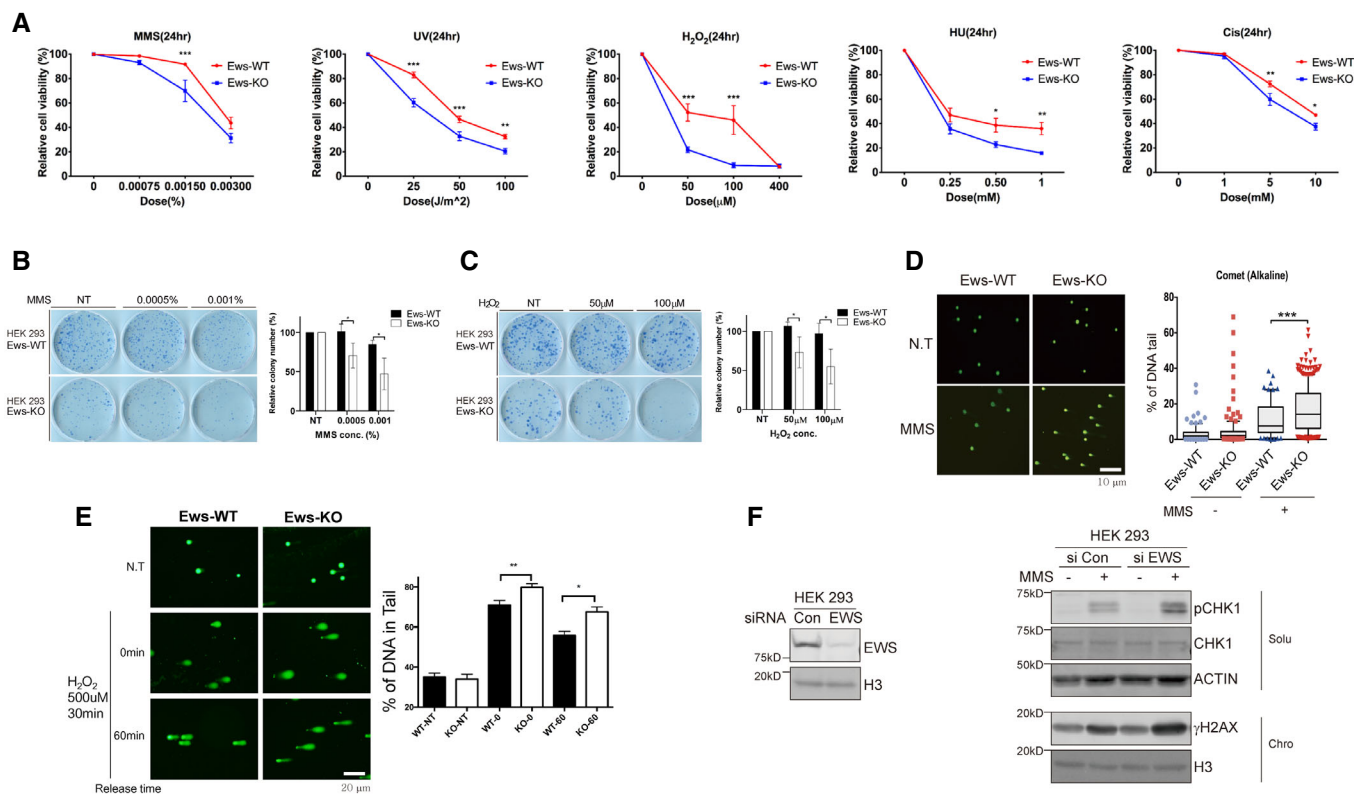

**Figure EV1. Loss of *Ews* induces hypersensitivity to DNA-damaging agents.**

- A** Relative cell viability was measured in wild-type (WT) and *Ews*-KO mBA cells after treatment with various DNA-damaging agents. MMS: Methyl methane sulfonate, H<sub>2</sub>O<sub>2</sub>: Hydrogen peroxide, Cis: Cisplatin, UV: Ultraviolet, and HU: Hydroxyurea. Error bars represent as mean ± SEMs, and technical repeats ( $n = 3$ ). Significance determined by two-way ANOVA, \* $P < 0.05$ , \*\* $P < 0.01$ , \*\*\* $P < 0.001$ .
- B, C** After 10 days of low dose MMS (B) and H<sub>2</sub>O<sub>2</sub> (C) treatment, survived colony were measured using clonogenic assay. Data represented as mean ± SEMs,  $n > 3$ . Significance determined by Student's *t*-test, two-tailed, \* $P < 0.05$ .
- D** DNA breaks in wild-type (*Ews*-WT) and *Ews*-KO mBA cells were measured using Alkaline Comet assay after MMS treatment (0.0015%, 24 h). Error bars represent as mean ± SEMs,  $n > 50$ . Significance determined by \*\*\* $P < 0.001$ .
- E** Alkaline Comet assay were conducted in *Ews*-WT and *Ews*-KO mBA cells after treatment and release of H<sub>2</sub>O<sub>2</sub>. Error bars represent ± SEMs,  $n > 50$ . Significance determined by two-way ANOVA, \* $P < 0.05$ , \*\* $P < 0.01$ .
- F** Upon inactivation of *EWS* in HEK-293 cells, expression of DNA damage markers (pCHK1 and γH2AX) were measured using Western blotting after MMS (0.02%, 1 h) treatment.

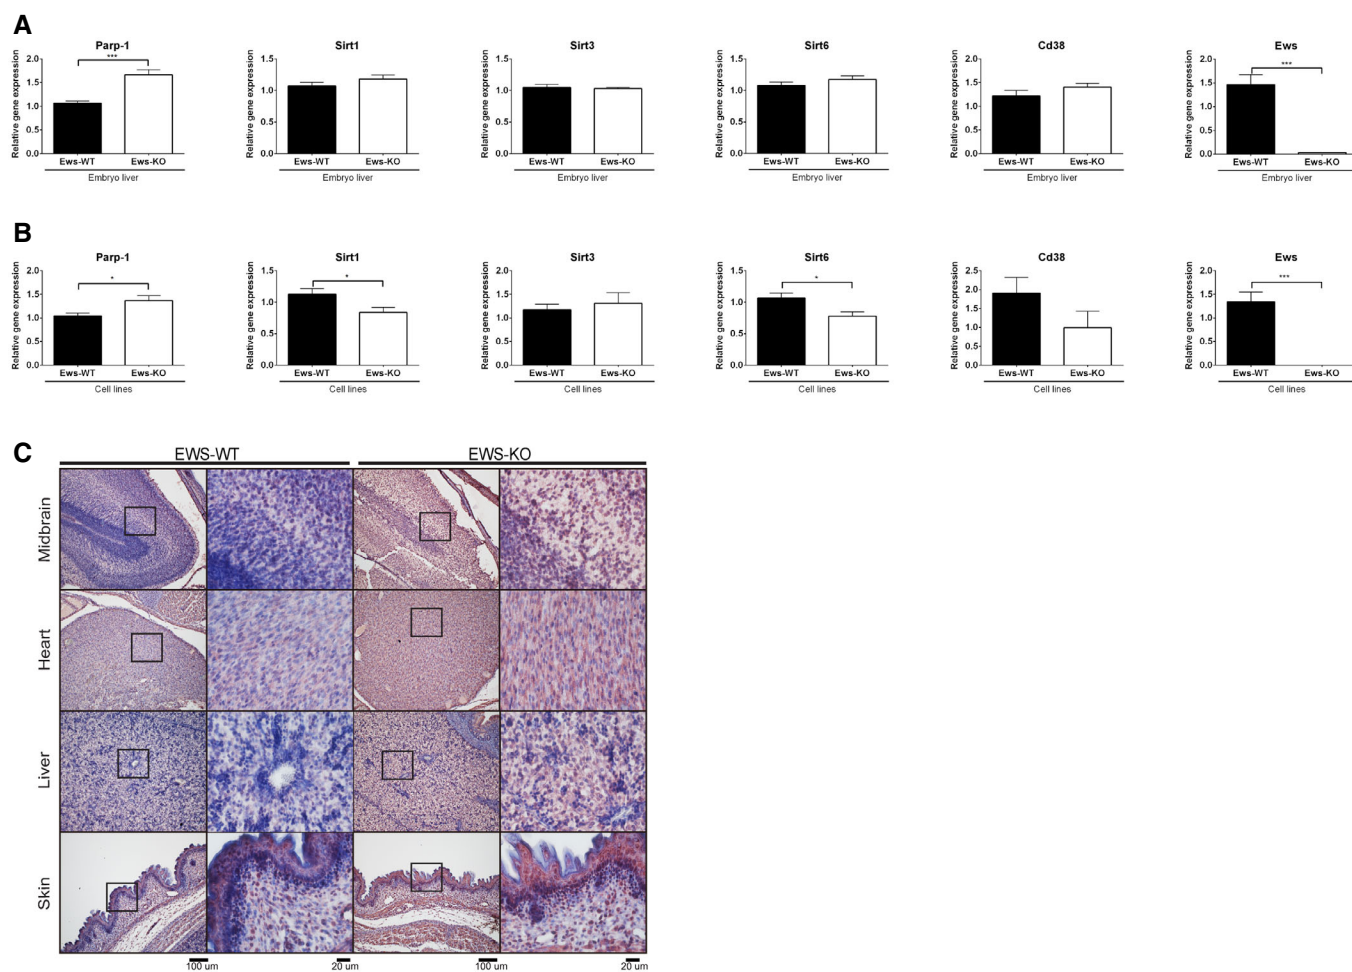

**Figure EV2. EWS depletion induces PARP1 expression in mouse embryo and cell lines.**

- A, B Quantitative real-time PCR was carried out to investigate the expression level of NAD<sup>+</sup> salvage pathway genes using E17.5 day embryos liver (A) and cell lines (B). Data represented as mean  $\pm$  SEMs, and obtained from three different cell line and embryo liver. Significance determined by Student's *t*-test, two-tailed, \**P* < 0.05, \*\*\**P* < 0.001.
- C Immunostaining of 17.5 days embryo tissues (mid-brain, heart, liver, and skin) with anti-PARP1-antibody. Insert shows higher magnification. Scale bar indicates 200  $\mu$ m (left).

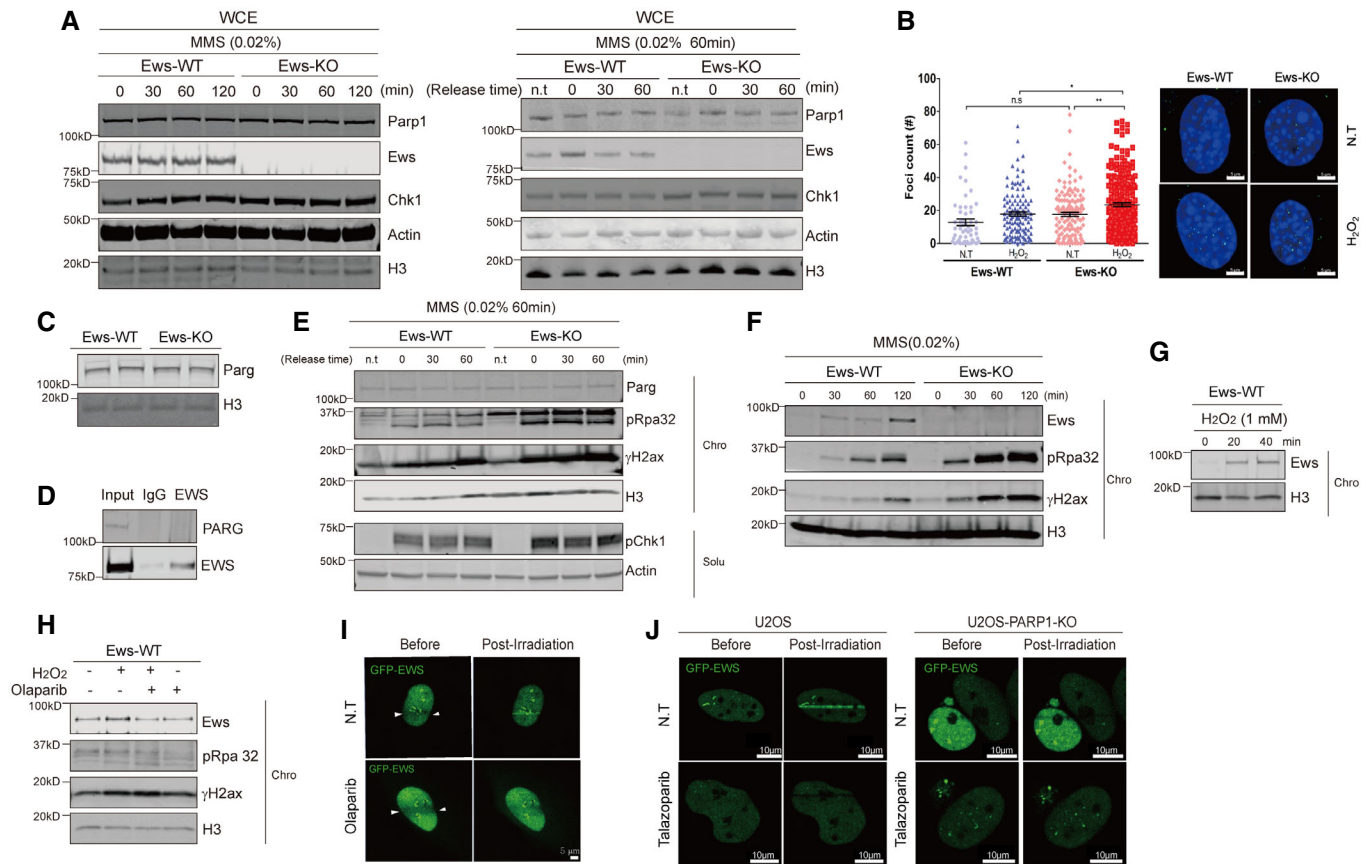

**Figure EV3. EWS protein is recruited to DNA damage site in a PARP1 dependent manner and regulates PARP1 dissociation from DNA damage sites.**

- A Whole cell extract of wild-type and Ews-KO cells following MMS treatment and release were subjected to Western blotting.
- B, C (B) Immunofluorescence with anti-PARP1 antibody in wild-type and Ews-KO cells following  $H_2O_2$  treatment. Scale bar indicate  $5 \mu m$ .  $n > 150$  (C) PARG expression was measured by Western blot in wild-type and Ews-KO mBA cells.
- D Endogenous interaction between EWS and PARG were analyzed by co-immunoprecipitation followed by Western blot analysis with anti-EWS antibody.
- E After release from MMS treatment, proteins in cells were fractionated into chromatin-bound and soluble forms to measure PARG kinetics in wild-type and Ews-KO mBA cells.
- F, G Chromatin-bound levels of EWS were measured after treatment of MMS (F) or  $H_2O_2$  (G).
- H Wild-type cells were treated with  $1 mM H_2O_2$  for 20 min with or without PARPi ( $5 \mu M$  Olaparib for 7 h). The kinetics of chromatin-bound EWS was analyzed by Western blot.
- I Localized specific DNA damage was induced in GFP-EWS cell lines with or without Olaparib using micro-irradiation. Scale bar represents  $5 \mu m$ .
- J DNA damage was induced by micro-irradiation in U2OS and U2OS-PARP1-KO cells with or without Talazoparib ( $5 \mu M$ , 24 h). Scale bar represents  $10 \mu m$ .  $N > 10$ .

Source data are available online for this figure.

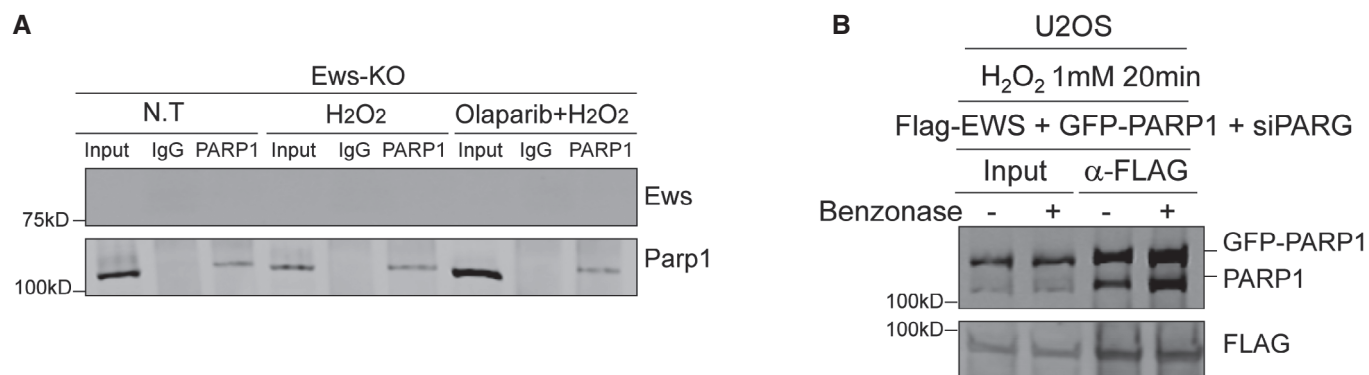

**Figure EV4. RGG domain of Ews interact with PARP1.**

A Interaction between EWS and PARP1 was analyzed by Immunoprecipitation assay in Ews-KO cells. Cells were treated with H<sub>2</sub>O<sub>2</sub> (1 mM, 10 min) with or without Olaparib (5 μM, 7 h).

B With or without Benzonase-treated cells were immune-precipitated by anti-FLAG antibody and immunoblotted by anti-PARP1 and FLAG antibody.

Source data are available online for this figure.

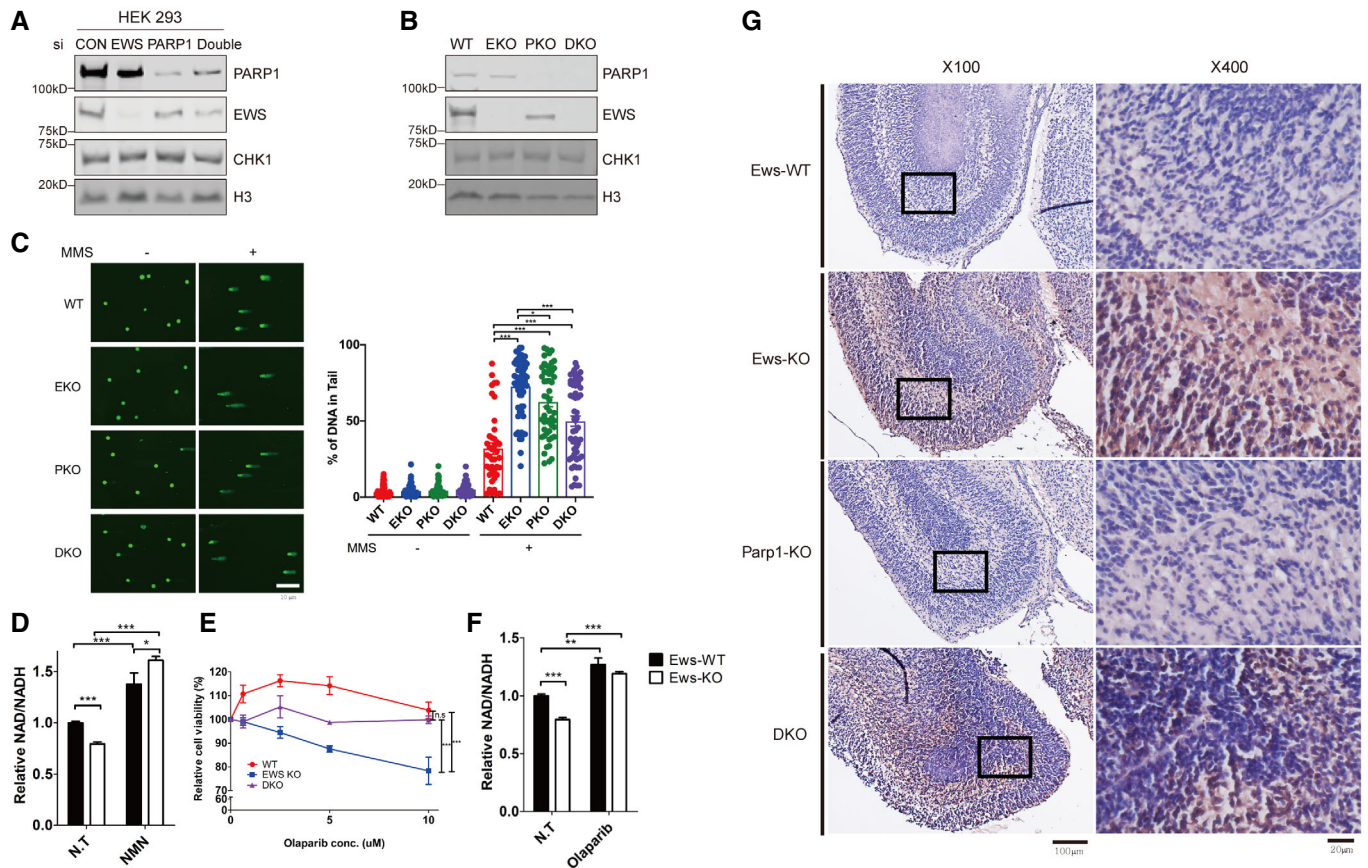

**Figure EV5. EWS regulates genomic integrity in PARP1-dependent manner.**

A, B Whole cell expressions of PARP1, EWS and CHK1 were measured in Figs 5A (A) and EV5C (B) cells.

C DNA breaks were measured using the Alkaline Comet assay in WT, EKO, PKO, and DKO cells treated with MMS (0.0015%, 24 h). WT: Wild-type, EKO: Ews-KO, PKO: Parp1-KO and DKO: double KO. Error bars represent  $\pm$  SEMs,  $n > 35$ . Significance determined by two-way ANOVA, \* $P < 0.05$ , \*\* $P < 0.01$ , \*\*\* $P < 0.001$ .

D Relative  $\text{NAD}^+/\text{NADH}$  ratios were measured in wild-type (Ews-WT) and Ews-KO cells following treatment of NMN (20  $\mu\text{M}$ , 24 h). Error bars represent as mean  $\pm$  SEMs, and technical repeats ( $n = 3$ ). Significance determined by two-way ANOVA, \* $P < 0.05$ , \*\* $P < 0.01$ , \*\*\* $P < 0.001$ .

E Relative cell viability was measured in HEK293 WT, EWS-KO and EWS-PARP1 KO (DKO) cell lines upon Olaparib treatment. Error bars represent as mean  $\pm$  SEMs, and technical repeats ( $n = 3$ ). Significance determined by two-way ANOVA, \* $P < 0.05$ , \*\* $P < 0.01$ , \*\*\* $P < 0.001$ .

F  $\text{NAD}^+/\text{NADH}$  ratios were measured in wild-type (Ews-WT) and Ews-KO cells after treatment of Olaparib (5  $\mu\text{M}$  24 h). Error bars represent as mean  $\pm$  SEMs, and technical repeats ( $n = 3$ ). Significance determined by two-way ANOVA, \* $P < 0.05$ , \*\* $P < 0.01$ , \*\*\* $P < 0.001$ .

G Cell death was observed in wild-type (Ews-WT), Ews-KO, Parp1-KO, and DKO embryos mid-brain at E17.5 days using the TUNEL assay.  $\times 100$  and  $\times 400$  image scale bar represents 100  $\mu\text{m}$  and 20  $\mu\text{m}$ , respectively.
